# Supplementary material for: Overexpression of CENPF correlates with poor prognosis and tumor bone metastasis in breast cancer
Source: Springer Nature journal article supplement (doi:10.1186/s12935-019-0986-8), 2019-10-11

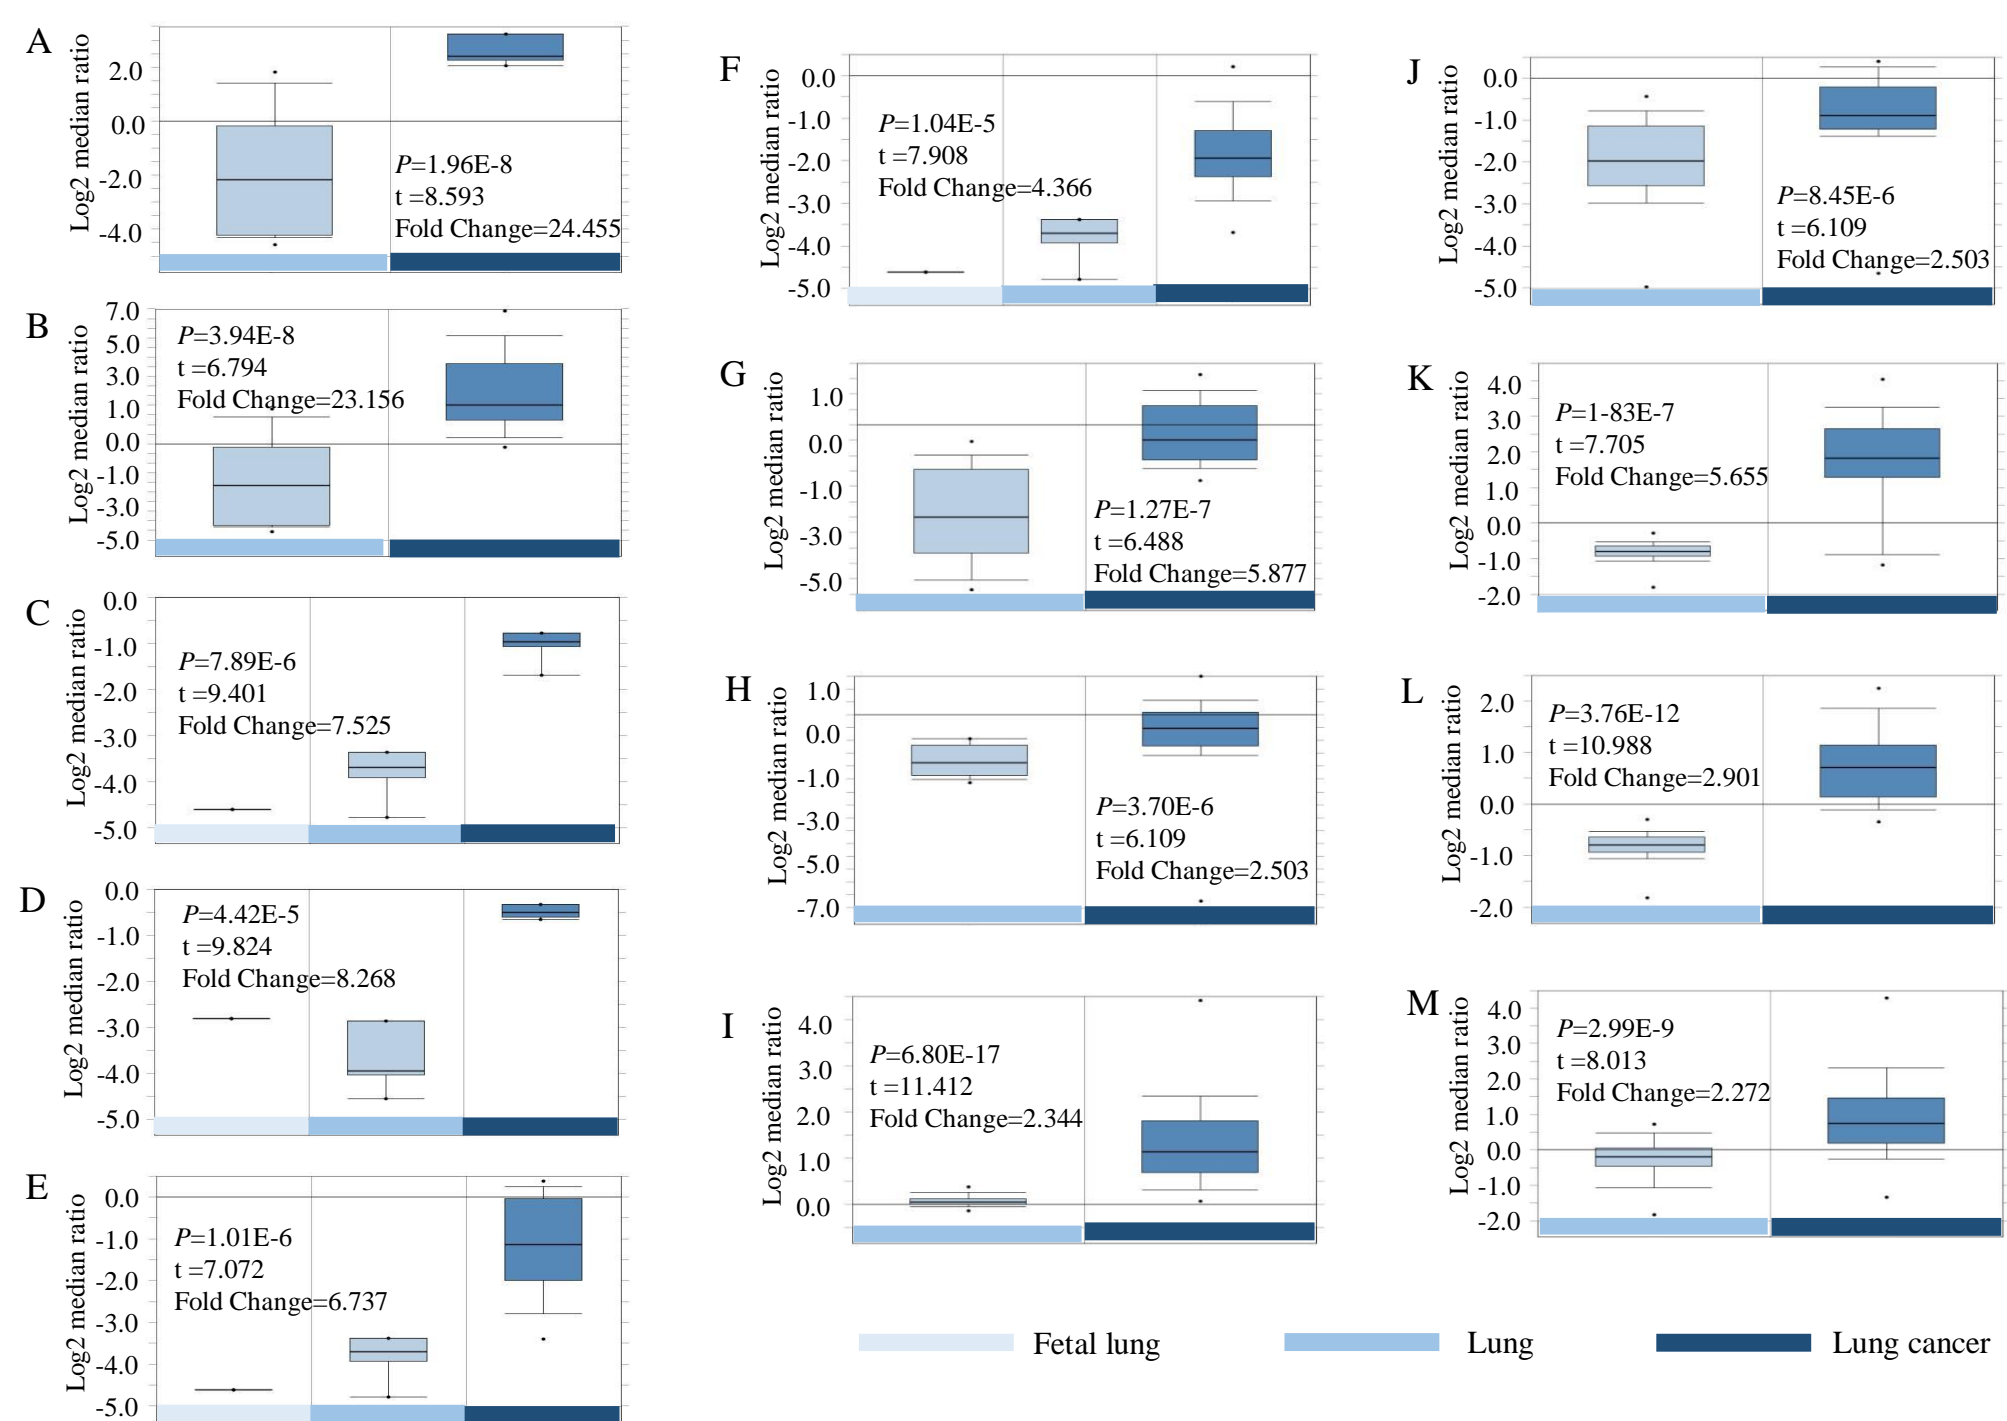

Supplement: MOESM1 [file 17265084]
